# Supplementary material for: Manganese tetraphenylporphyrin and carbon nanocoil interface-based electrochemical sensing of tyrosine
Source: Royal Society of Chemistry journal article supplement (doi:10.1039/d4ra02048k), 2024-01-01
Supplement: d4ra02048k1.pdf [file d4ra02048k1.pdf]

## Supplementary Information

### Manganese Tetraphenylporphyrin and Carbon Nanocoils Interface based Electrochemical Sensing of Tyrosine

Syeda Aqsa Batool Bukhari<sup>1</sup>, Abeera Aziz<sup>1</sup>, Habib Nasir<sup>1\*</sup>, Sharif Ullah<sup>1</sup>, Tehmina Akhtar<sup>1</sup>, Sadia Iram<sup>1,2</sup>, Effat Sitara<sup>1,3</sup>, Shehla Mushtaq<sup>1,4</sup> and Syed Abdul Moiz<sup>5</sup>

<sup>1</sup>Department of Chemistry, School of Natural Sciences, National University of Sciences and Technology H-12 Islamabad (44000) Pakistan

<sup>2</sup>Department of Chemistry, Rawalpindi women university Rawalpindi Pakistan

<sup>3</sup>Department of Chemistry, Karakoram International University, Gilgit, Pakistan.

<sup>4</sup>Department of Chemistry, University of Management and Technology, Sialkot, Pakistan

<sup>5</sup>Department of Electrical Engineering, Umm Al-Qura University, Saudi Arabia

\*Corresponding Author's Email: [habibnasir@sns.nust.edu.pk](mailto:habibnasir@sns.nust.edu.pk)

### Figures

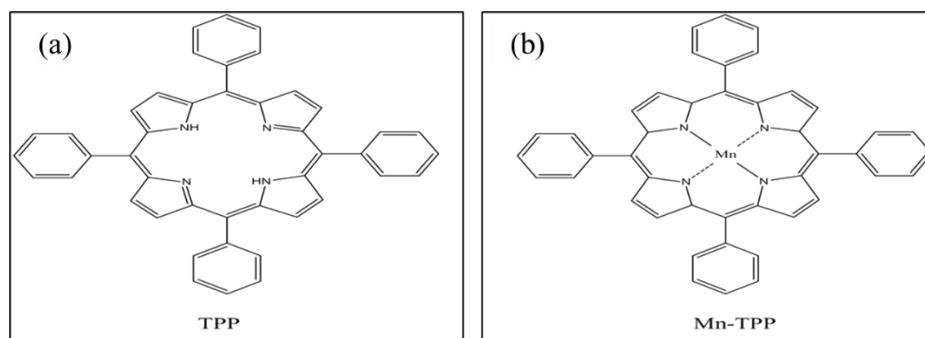

Figure S1. Chemical structure of (a) tetraphenylporphyrin and (b) Manganese tetraphenylporphyrin.

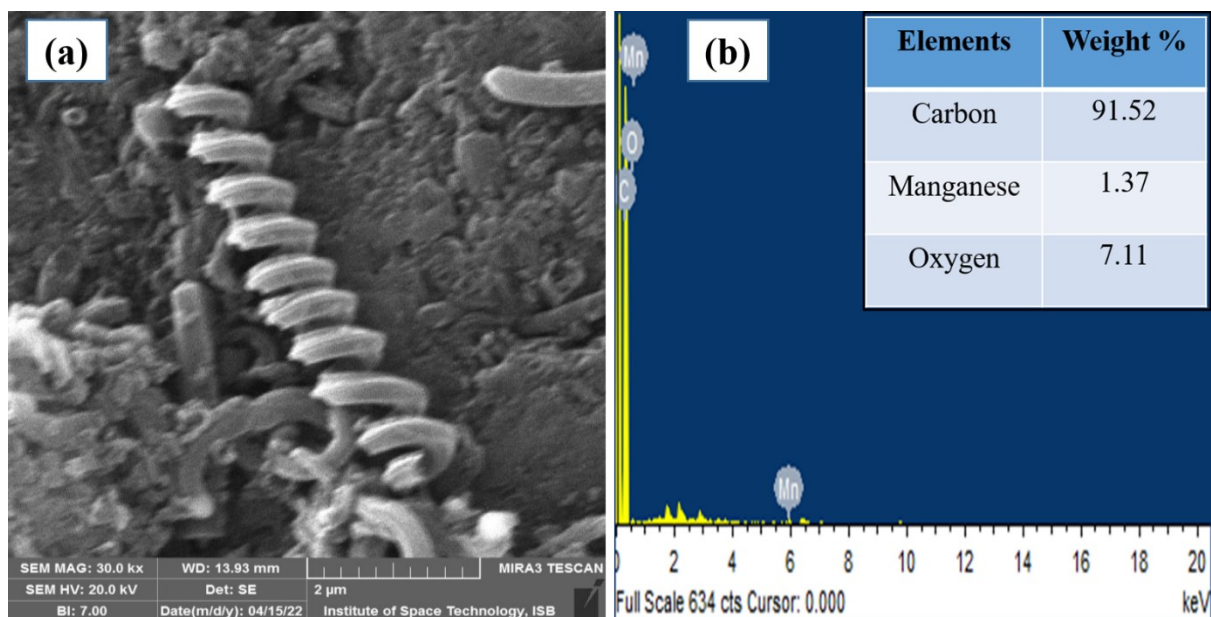

Figure S2. Analysis of CNC/MnTPP nanocomposite (a) SEM and (b) EDS.

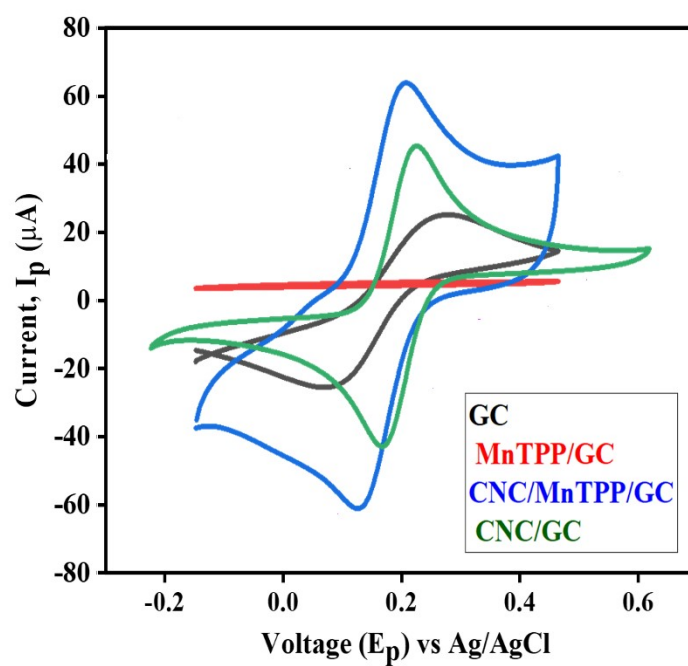

Figure S3. Cyclic voltammograms obtained in 5 mM potassium ferricyanide solution (0.1 M KCl).

## Schemes

### Calculation:

Slope of  $\frac{E_{pa}}{\log v} = 0.06$  (From calibration curve of Figure 9 d)

As we know that, 
$$\text{Slope of } \frac{E_{pa}}{\log v} = \frac{2.303 R \times T}{n\alpha F} \quad \text{Eq. 1}$$

By substituting the values of R, T, F which are the parameters with usual meanings such as gas constant, absolute temperature, Faraday's constant, respectively and Slope in Eq.1, the value obtained for  $n\alpha$  equals to **1.002**.

While the value of  $\alpha$  can be obtained from another equation (Eq. 2)

$$\alpha = \frac{47.7}{E_p - E_{p1/2}} \quad \text{Eq. 2}$$

Whereas  $E_p = E_{pa} = 800$  mV ;  $E_{p1/2} = 715$  mV, so by placing these values in Eq. 2 the value of  $\alpha$  equals to **0.56**

After solving Eq. 3

$$\begin{aligned} n\alpha &= 1.002 \\ n &= \frac{1.002}{0.56} = 1.78 \cong 2 \end{aligned} \quad \text{Eq. 3}$$

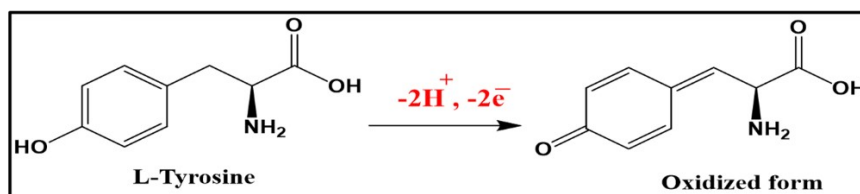

Scheme S1. Probable mechanism of tyrosine detection.

## Tables

Table S1. Selectivity study data for CNC/MnTPP/GC towards tyrosine at pH 5.

| Interfering agents       | Current ( $\mu\text{A}$ ) | Tolerance (%) |
|--------------------------|---------------------------|---------------|
| Tyrosine                 | 9.67                      | --            |
| Tyrosine + Dopamine      | 10.06                     | -4.03 %       |
| Tyrosine + Ascorbic acid | 9.68                      | -0.10 %       |
| Tyrosine + Uric acid     | 8.91                      | +7.85 %       |

|                    |      |         |
|--------------------|------|---------|
| Tyrosine + Glucose | 9.19 | +4.96 % |
| Tyrosine + Glycine | 9.63 | +0.41 % |

Table S2. Comparison of the Performance of CNC/MnTPP/GC Sensor with Existing Literature.

| Sr. # | Electrode                                    | Linear range                                                     | LoD                             | Method            | Reference    |
|-------|----------------------------------------------|------------------------------------------------------------------|---------------------------------|-------------------|--------------|
| 1     | CB-GO/CP <sup>a</sup>                        | 0.1–2 mM                                                         | 100 $\mu$ M                     | --                | 1            |
| 2     | GR/ZnO/GSPE <sup>b</sup>                     | 1.0 $\times$ 10 <sup>-6</sup> to 8.0 $\times$ 10 <sup>-4</sup> M | 3.4 $\times$ 10 <sup>-7</sup> M | SQV               | 2            |
| 3     | CoTPyPRu(bipy) <sub>2</sub> -Ba <sup>c</sup> | 1 to 24 $\mu$ M                                                  | 0.5 $\mu$ M                     | SQV               | 3            |
| 4     | Hemin/PAMAM/MWCNT <sup>d</sup>               | 0.1 $\mu$ M to 28.8 $\mu$ M                                      | 0.01 $\mu$ M                    | Chronoamperometry | 4            |
| 5     | TCPP-Sa/CPE <sup>e</sup>                     | 3 to 51 $\mu$ M                                                  | 0.7 $\mu$ M                     | SQV               | 5            |
| 6     | CNC/MnTPP/GC                                 | 0.05 to 100 $\mu$ M                                              | 0.021 $\mu$ M                   | DPV               | Present work |

<sup>a</sup> CB-GO/CP: carbon black/graphene oxide/hydrophilic carbon paper

<sup>b</sup> GR/ZnO/GSPE: Graphene oxide/ZnO nanorods/graphite screen-printed electrodes.

<sup>c</sup>CoTPyPRu(bipy)<sub>2</sub>-Ba:  $\mu$ -*meso*-tetra(4-pyridyl)porphyrinatecobalt(II)tetrakis[bis(bipyridine) (chlorido) ruthenium(II)- Cameroonian smectite clay form Bagba hill.

<sup>d</sup> Hemin/PAMAM/MWCNT: iron protoporphyrin IX/poly(amidoamine)/multi-walled carbon nanotube.

<sup>e</sup>TCPP-Sa/CPE: Meso-tetra(4-carboxyl phenyl) porphyrin immobilized Cameroonian smectite clay from Sabga hill deposited on carbon paste electrode.

## References

1. Q. Bao, G. Li, Z. Yang, P. Pan, J. Liu, R. Tian, Q. Guo, J. Wei, W. Hu and W. Cheng, *Microchemical Journal*, 2023, **185**, 108238.
2. H. Beitollahi and F. Garkani Nejad, *Electroanalysis*, 2016, **28**, 2237-2244.
3. J. C. Kemmegne-Mbouguen, H. E. Toma, K. Araki, V. R. L. Constantino, E. Ngameni and L. Angnes, *Microchimica Acta*, 2016, **183**, 3243-3253.
4. Q. Ma, S. Ai, H. Yin, Q. Chen and T. Tang, *Electrochimica Acta*, 2010, **55**, 6687-6694.
5. J. C. Kemmegne-Mbouguen and E. Ngameni, *Analytical Methods*, 2017, **9**, 4157-4166.
